# Supplementary material
Source: MDPI journal article supplement (https://www.mdpi.com/2039-7283/13/1/4)
Supplement: s1 [file s1]

Database: Embase <1988 to 2022 Week 33>, Ovid MEDLINE(R) <1946 to September 2022>, EBM Reviews - Cochrane Central Register of Controlled Trials < September 2022>, EBM Reviews - Cochrane Database of Systematic Reviews <2005 to September, 2022>  
Search Strategy:

---

- 1 plant based\$.mp.
- 2 Mediterranean diet\$.mp.
- 3 exp mediterranean diet\$/  
4 Mediterranean food\$.mp.
- 5 Dash diet\$.mp.
- 6 exp DASH diet\$/  
7 Dietary approach to stop hypertension\$.mp.
- 8 exp Dietary approach to stop hypertension\$/  
9 Dialysis\$.mp.
- 10 exp dialysis\$/  
11 hemodialysis\$.mp.
- 12 exp hemodialysis\$/  
13 peritoneal dialysis\$.mp.
- 14 exp peritoneal dialysis\$/  
15 9 or 10 or 11 or 12 or 13 or 14
- 16 1 and 15
- 17 1 or 2 or 3 or 4 or 5 or 6 or 7 or 8
- 18 15 and 17
